# Supplementary material for: Exploring Target Genes Involved in the Effect of Quercetin on the Response to Oxidative Stress in Caenorhabditis elegans
Source: PubMed Central journal article supplement (PMC6943653; doi:10.3390/antiox8120585), 2019-11-25
Supplement: antioxidants-08-00585-s001.pdf [file antioxidants-08-00585-s001.pdf]

**Table S1:** Oligonucleotide sequence of primers used to determine the expression levels of *C. elegans* genes by RT-QPCR

| Protein  | Gene            | Forward (5'-3')          | Reverse (5'-3')        | Size bp | Accession number | References                    |
|----------|-----------------|--------------------------|------------------------|---------|------------------|-------------------------------|
| ACT-1    | <i>act-1</i>    | CCAGGAATTGCTGATCGTATG    | GGAGAGGGAAGCGAGGATAG   | 131     | NM_073418.6      | [1]                           |
| SKN-1    | <i>skn-1</i>    | AGTGTCGGCGTTCCAGATTC     | GTCGACGAATCTTGCGAATCA  | 109     | NM_171345.5      | [2]                           |
| DAF-16   | <i>daf-16</i>   | CCAGACGGAAGGCTTAAACT     | ATTTCGCATGAAACGAGAATG  | 148     | NM_001026422.5   | [3]                           |
| HSF-1    | <i>hsf-1</i>    | GAAATGTTTIGCCGCATTTT     | CCTTGGGACAGTGGAGTCAT   | 99      | NM_060630.4      | [4]                           |
| HSP-16.2 | <i>hsp-16.2</i> | CTGCAGAATCTCTCCATCTGAGTC | AGATTCGAAGCAACTGCACC   | 236     | NM_071106.8      | [3]                           |
| DAF-18   | <i>daf-18</i>   | ACATGCTGCGTCAGGATTAT     | AAGGAATTGTCCGATGGTACTT | 145     | NM_067525.6      | Designed by the research team |

\* All the sequences have been obtained from <https://www.wormbase.org> and have been validated with their access number using the NIH databases

<https://blast.ncbi.nlm.nih.gov/blast.cgi>

1. Surco-Laos, F.; Cabello, J.; Gómez-Orte, E.; González-Manzano, S.; González-Paramás, A.M.; Santos-Buelga, C.; Dueñas, M. Effects of O-methylated metabolites of quercetin on oxidative stress, thermotolerance, lifespan and bioavailability on *Caenorhabditis elegans*. *Food Funct.* 2011, 2, 445-56. doi: 10.1039/c1fo10049a
2. Martinez-Finley E.J.; Caito S.; Slaughter J.C.; Aschner, M. The Role of *skn-1* in methylmercury-induced latent dopaminergic neurodegeneration. *Neurochem Res.* 2013,38, 2650-60. doi: 10.1007/s11064-013-1183-0.
3. Zhang, J.; Lu, L.; Zhou, L. Oleanolic acid activates daf-16 to increase lifespan in *Caenorhabditis elegans*. *Biochem Biophys Res Commun.* 2015, 25, 468, 843-849. doi: 10.1016/j.bbrc.2015.11.042.
4. Kern, A.; Ackermann, B.; Clement, A.M.; Duerk, H.; Behl, C. HSF1-controlled and age-associated chaperone capacity in neurons and muscle cells of *C. elegans*., *PLoS One.* 2010, 5, e8568. doi: 10.1371/journal.pone.0008568.
